# Supplementary material for: One-pot route to convert technical lignin into versatile lignin esters for tailored bioplastics and sustainable materials
Source: Royal Society of Chemistry journal article supplement (doi:10.1039/d1gc01033f), 2021-01-01
Supplement: d1gc01033f1.pdf [file d1gc01033f1.pdf]

# Supplementary information: One-pot route to convert technical lignin into versatile lignin esters for tailored bioplastics and sustainable materials

Li-Yang Liu<sup>a</sup>, Siwei Chen<sup>a</sup>, Lun Ji<sup>a</sup>, Soo-Kyeong Jang and Scott Rennekar<sup>a1</sup>

<sup>a</sup>Department of Wood Science, The University of British Columbia, Vancouver, BC, Canada, V6T1R9

## Table of contents

|                 |          |
|-----------------|----------|
| Table S1 .....  | Page S2  |
| Table S2 .....  | Page S3  |
| Figure S1 ..... | Page S4  |
| Figure S2.....  | Page S5  |
| Figure S3.....  | Page S6  |
| Table S3.....   | Page S7  |
| Table S4.....   | Page S8  |
| Figure S4.....  | Page S9  |
| Figure S5.....  | Page S10 |
| Table S5.....   | Page S11 |
| Figure S6.....  | Page S12 |
| Table S6.....   | Page S13 |
| Figure S7.....  | Page S14 |
| Figure S8.....  | Page S15 |
| Table S7.....   | Page S16 |
| References..... | Page S17 |

---

<sup>1</sup> Corresponding author: [scott.rennekar@ubc.ca](mailto:scott.rennekar@ubc.ca)

**Table S1** Input materials and chemicals, including lignin, ethylene carbonate (EC), propionic acid (PA), and total added water, and the obtained products, including the volume of CO<sub>2</sub> per gram of lignin, solvent residue, and recovered lignin products (F1, F2, F3, F4, and F5)

|   | Lignin/g | EC/g | CO <sub>2</sub><br>/(ml/g) | PA/ml | Solid<br>Residue/g | Solvent<br>Mixture /mL | Total Added<br>Water/mL* | F1/g- | F2 /g | F3/g | F4/g | F5/g |
|---|----------|------|----------------------------|-------|--------------------|------------------------|--------------------------|-------|-------|------|------|------|
| 1 | 10       | 20.2 | 110.8                      | 180   | 1.0                | -                      | -                        | -     | -     | -    | -    | -    |
| 2 | 10       | 31.2 | 134.0                      | 180   | 2.9                | -                      | -                        | -     | -     | -    | -    | -    |
| 3 | 3        | 9.3  | 107.7                      | 54    | 0.017              | 58                     | 174                      | 0.71  | 1.3   | 0.83 | 0.38 | 0.4  |
| 4 | 3        | 9.3  | 115.3                      | 54    | 0.019              | 58                     | 174                      | 0.90  | 1.3   | 0.74 | 0.32 | 0.3  |
| 5 | 3        | 9.3  | 107.7                      | 54    | 0.015              | 58                     | 174                      | 0.66  | 1.4   | 0.78 | 0.47 | 0.3  |
| 6 | 10       | 31.2 | 107.6                      | 180   | 0.35               | 200                    | 600                      | 3.99  | 3.8   | 2.3  | 0.96 | 1.3  |

\* the washing water was not involved in this process

**Table S2** The molar mass of standard polystyrene sulfonate (PSS) samples and their hydrodynamic radius ( $R_h$ ) based on the viscometer detector

| PSS-No. | M <sub>w</sub> (Da) | M <sub>n</sub> (Da) | R <sub>h</sub> (V) <sub>w</sub> |
|---------|---------------------|---------------------|---------------------------------|
| PSS-1   | 751.5               | 598.1               | 34.1                            |
| PSS-2   | 522.7               | 473.2               | 21.7                            |
| PSS-3   | 228                 | 222.4               | 13                              |
| PSS-4   | 42.2                | 41.9                | 5.2                             |
| PSS-5   | 32                  | 32                  | 4.5                             |
| PSS-6   | 12.2                | 12.2                | 2.6                             |
| PSS-7   | 5.5                 | 5.5                 | 1.8                             |
| PSS-8   | 3.8                 | 3.5                 | 1.5                             |
| PSS-9   | 2.4                 | 2.1                 | 1.1                             |

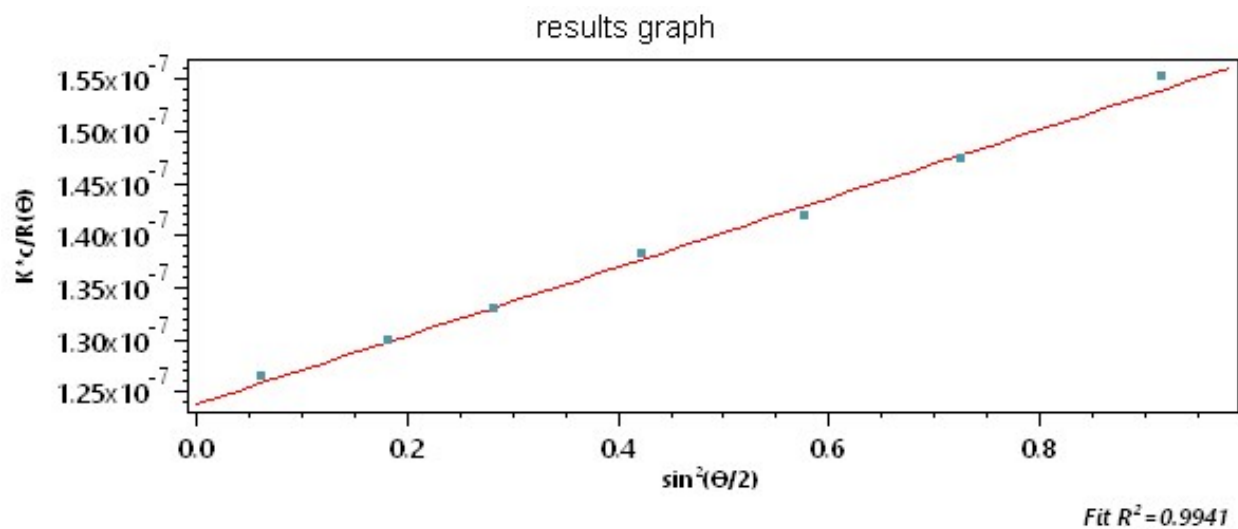

**Figure S1** Zimm plot of F1 lignin;  $R(\theta)$ : Excess Rayleigh ratio which is measured by the MALS instrument;  $c$ : solute concentration;  $K^*$ : the optical constant which related to the  $dn/dc$ .<sup>1</sup> Note, fluorescence suppressed using 10nm bandpass filters.

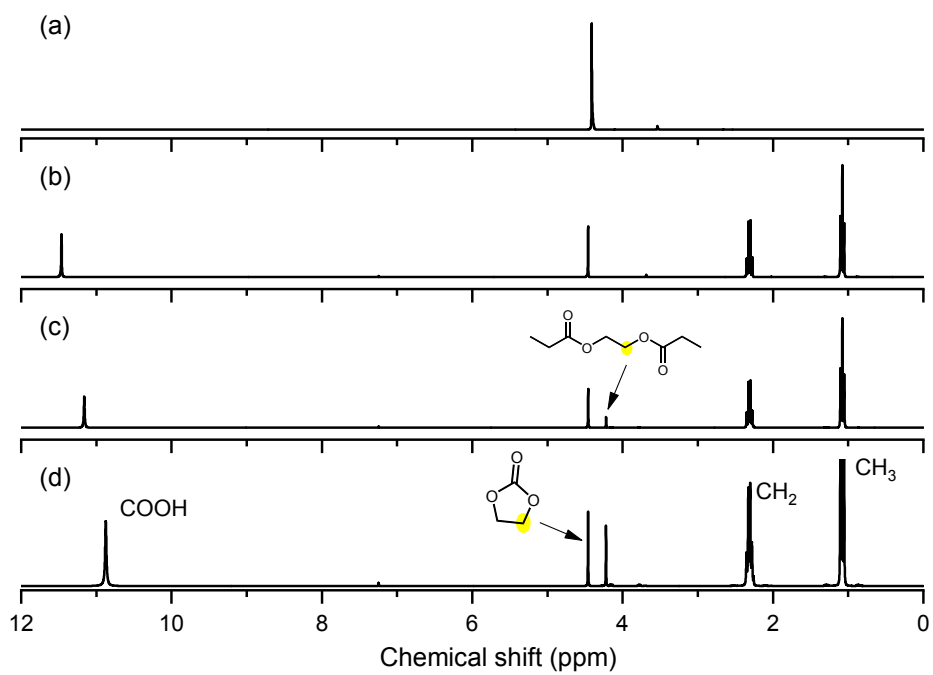

**Figure S2**  $^1\text{H}$  NMR spectrum of EC (a), EC/PA mixture (b), EC/PA at  $120^\circ\text{C}$  for 24 h (c), EC/PA at  $120^\circ\text{C}$  for 48 h (d). Sample preparation: 50 mg samples were dissolved into 500  $\mu\text{L}$  deuterium chloroform ( $\text{CDCl}_3$ ) and transferred into 5 mm NMR tubes. Acquisition parameter: scan number 256; delay time 10 s; Pulse length: 14  $\mu\text{s}$ ; Acquisition time: 5.3 s.<sup>2</sup>

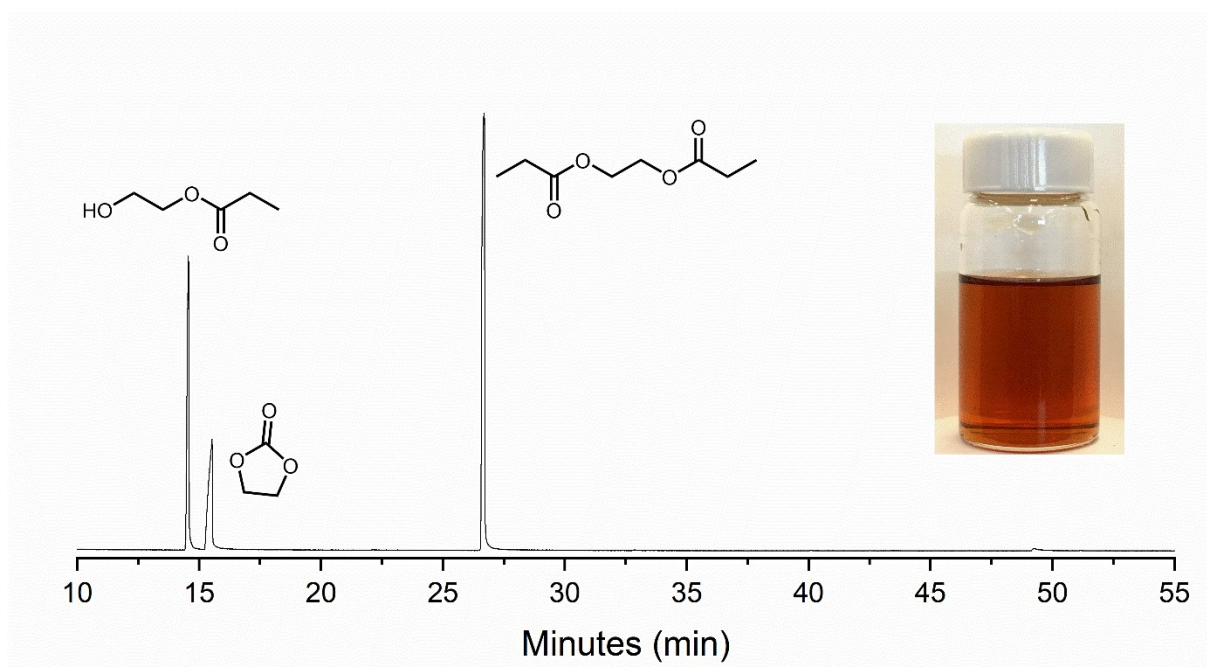

**Fig. S3** GC-MS spectrum of collect solvent residue (reddish solution) after the one-pot esterification. For the GC-MS, the solvent residue were analyzed by a 8890 GC system with a 7010B GC/TQ using a DB-5MS UI column (30 m × 0.25 mm × 0.5 μm) of Agilent Technologies (Santa Clara, CA, USA) with helium as a carrier gas at a constant flow rate of 1.1 mL/min. Sample injection was designated at 1 μL with a split ratio of 1:100. The oven temperature was initially set at 50 °C and maintained for 5 min, increased to 300 °C at 3 °C/min rate and kept for 10 min. The electron impact (EI) ionization used for mass detection and the electron energy was set at 70 eV. The scan range was designated from 30 to 500 m/z and the scan time was kept 200 ms with a solvent delay of 8 min for mass data acquisition.

**Table S3** Reagent utilization for traditional esterification methods of solvent fractionated lignin resources (starting with 100 g softwood kraft lignin)\*

| Step | Lignin                 | Solvent   | Solvent mass/g | Recovered Lignin mass1/g | Total OH groups / (mmol/g) | Step | Propionyl chloride/g | Solvent Mass/g | Catalyst Mass/g | Precipitated solvent/g <sup>a</sup> | Recovered lignin mass2/ g | PMI /(g/g) |
|------|------------------------|-----------|----------------|--------------------------|----------------------------|------|----------------------|----------------|-----------------|-------------------------------------|---------------------------|------------|
| 1    |                        |           |                |                          |                            | 2    |                      |                |                 |                                     |                           |            |
|      | F <sub>EtOAc</sub>     | EtOAc     | 902            | 24.5                     | 5.90                       |      | 17.4                 | 165            | 18.7            | 2015                                | 19.6                      | 166        |
|      | F <sub>Ethanol</sub>   | Ethanol   | 789            | 32.5                     | 6.55                       |      | 25.6                 | 219            | 24.9            | 2698                                | 26                        | 146        |
|      | F <sub>Methanol</sub>  | Methanol  | 792            | 8.2                      | 6.30                       |      | 6.2                  | 55             | 6.3             | 1017                                | 6.56                      | 287        |
|      | F <sub>Acetone</sub>   | Acetone   | 784            | 14.7                     | 6.15                       |      | 10.8                 | 99             | 11.3            | 1213                                | 11.76                     | 181        |
|      | F <sub>Insoluble</sub> | Insoluble | 1000           | 20                       | 5.70                       |      | 13.7                 | 135            | 15.3            | 1640                                | 16                        | 176        |

\* the step 1 solvent fractionation process was developed by Duval et al<sup>3-6</sup>. step 2 the esterification process was developed by Koivu et al<sup>7,8</sup>. In this process, the solvent mixture is THF/DMF (4:1) and has a ratio with lignin (7.5 ml/g); the catalyst is pyridine and has a volume ratio with lignin (4 ml/g); the recovered lignin yield after the esterification was assumed as 80%<sup>7,8</sup>. The precipitation solvent is assumed as 10 times of the volume of solvent, reagents, and catalysts in order to recover the lignin particles. The washing reagents were not involved in this process. PMI, process mass intensity

**Table S4** Relative molar mass of different esterified lignin fractions

|          | dRI <sup>a</sup> |        |     | IV <sup>b</sup> |        |      |
|----------|------------------|--------|-----|-----------------|--------|------|
|          | Mw/kDa           | Mn/kDa | Đ   | Mw/kDa          | Mn/kDa | Đ    |
| Lignin   | 9.3              | 1.1    | 8.4 | 13.1            | 0.6    | 22.0 |
| HELignin | 18.2             | 0.9    | 19  | 52.6            | 0.7    | 72.7 |
| F1       | 128.9            | 14.7   | 8.7 | 121.6           | 16.8   | 8.7  |
| F2       | 42.76            | 4.3    | 9.9 | 30              | 5.7    | 5.4  |
| F3       | 4.60             | 1.4    | 3.3 | 4.2             | 1.4    | 3.0  |
| F4       | 1.47             | 0.6    | 2.6 | 1.4             | 0.5    | 2.6  |
| F5       | 0.73             | 0.3    | 2.8 | 0.6             | 0.2    | 2.8  |

<sup>a</sup> dRI, differential refractive index (conventional calibration analysis); <sup>b</sup> IV, intrinsic viscosity detector (universal calibration analysis);



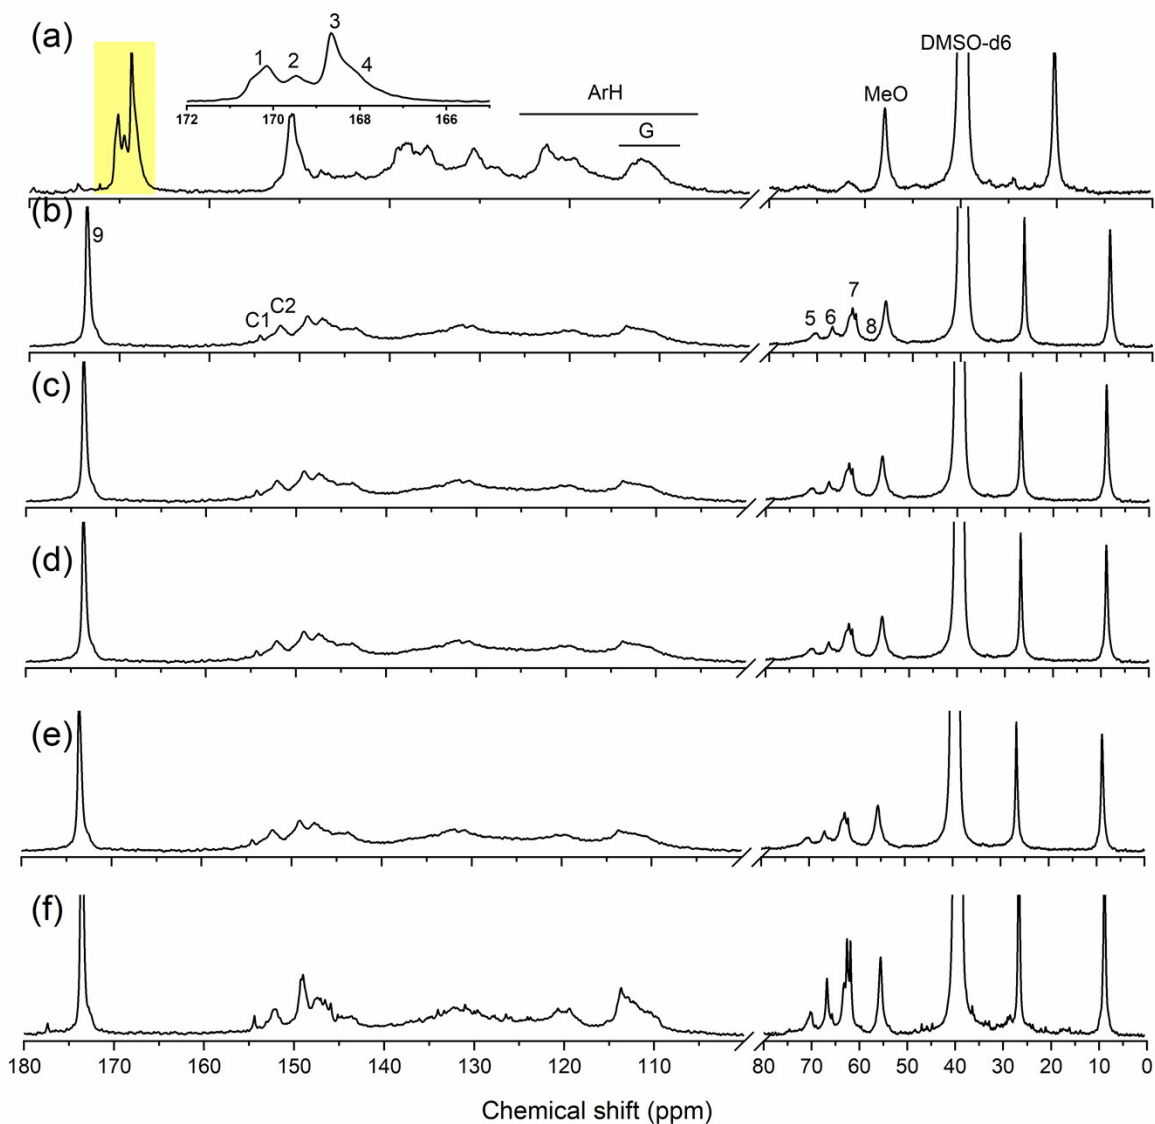

**Figure S4**  $^{13}\text{C}$  NMR spectrum of acetylated lignin and different esterified lignin fractions: (a) F1, (b) F2, (c) F3, (d) F4, and (e) F5; Sample preparation: 150 mg samples were dissolved into 450  $\mu\text{L}$  deuterium dimethyl sulfoxide (DMSO-d<sub>6</sub>), following with the addition of 60  $\mu\text{L}$  relaxation reagent (50 mg/ml chromium(III) acetylacetonate). Sample analysis parameters: acquisition program zgig; scan number 20 000; acquisition time: 1.4 s; delay time: 2 s; pulse length: 8.5  $\mu\text{s}$ . The acetylation procedure is described in our previous work.<sup>9,10</sup>

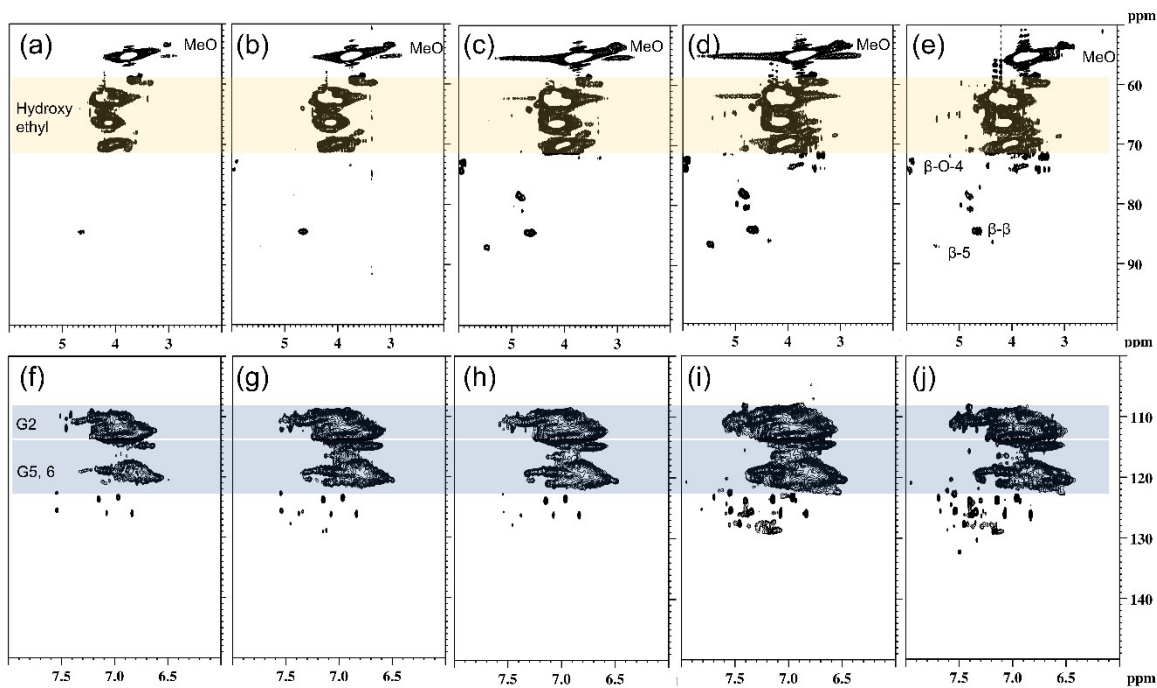

**Figure S5** 2D HSQC NMR spectra of different lignin fractions including oxygenated aliphatic region (top) and aromatic region (bottom); F1 (a, f), F2 (b, g), F3 (c, h), F4 (d, i), F5 (e, j); Sample preparation: 30 mg samples were dissolved into 500  $\mu$ L deuterium dimethyl sulfoxide (DMSO-d<sub>6</sub>). The sample analyzed parameters: acquisition program hsqcetgpsisp; scan number 16; acquisition time: 1.4 s; delay time: 2 s; pulse length: 8.5  $\mu$ s.<sup>11</sup>

**Table S5** Quantitative and semi-quantitative NMR analysis of lignin structural features including linkages, functional groups, and units

|                                                    | Chemical shift<br>(ppm)              | Lignin | F1    | F2    | F3    | F4    | F5    |
|----------------------------------------------------|--------------------------------------|--------|-------|-------|-------|-------|-------|
| <sup>31</sup> P NMR (mmol/g)                       |                                      |        |       |       |       |       |       |
| AlOH                                               | 150 – 145.6                          | 2.73   | 0.49  | 0.42  | 0.49  | 0.47  | 0.65  |
| ArOH                                               | 144.5 – 136                          | 4.77   | 0.22  | 0.48  | 0.25  | 0.40  | 0.11  |
| COOH                                               | 136 - 133                            | 0.68   | 0.17  | 0.16  | 0.18  | 0.23  | 0.46  |
| <sup>13</sup> C NMR (100 Ar)                       |                                      |        |       |       |       |       |       |
| Aliphatic hydroxyl groups<br>(AlOH, Peak 1+Peak 2) | 175 - 169.03                         | 42.0   | -     | -     | -     | -     | -     |
| Aromatic hydroxyl groups<br>(ArOH, Peak 3+Peak 4)  | 169.03 - 166                         | 57.4   | -     | -     | -     | -     | -     |
| Methoxy groups<br>(MeO)                            | 58 - 54                              | 76.6   | 81.8  | 83.4  | 88.7  | 85.2  | 81.9  |
| Aromatic hydrogen<br>(ArH)                         | 125 – 100                            | 218.3  | 203.3 | 211.5 | 223.1 | 226.0 | 233.1 |
| Guaiacyl units<br>(G)                              | 115 - 107                            | 81.3   | 87.3  | 95.3  | 105.7 | 109.7 | 118.7 |
| Carbonate 1 (C1)                                   | 155.9 - 153.3                        | -      | 17.3  | 13.6  | 10.7  | 11.0  | 10.9  |
| propionate<br>(Peak 9)                             | 175 - 170                            | -      | 100.6 | 100.4 | 103.1 | 120.5 | 124.8 |
| Ethyl group $\int_{(75-58)} / 2$                   |                                      | -      | 82.1  | 84.8  | 90.2  | 104.4 | 109.4 |
| - Peak 5                                           | 75 – 68.5                            | -      | 43.6  | 42.6  | 44.4  | 47.8  | 46.4  |
| - Peak 6                                           | 68.5 – 64.5                          | -      | 36.1  | 37.9  | 41.9  | 46.3  | 52.6  |
| Esterified hydroxyethyl<br>- Peak 7                | 65 – 61.5                            | -      | 74.2  | 79.2  | 85.9  | 104.9 | 109.0 |
| Aliphatic hydroxyethyl<br>- Peak 8                 | 61.5 - 58                            | -      | 10.5  | 9.9   | 8.2   | 9.8   | 10.7  |
| HSQC NMR (100 Ar)                                  |                                      |        |       |       |       |       |       |
| Stilbene-5 (SB5)                                   | $\delta C (118.9) / \delta H (7.3)$  |        | 1.73  | 1.54  | 1.74  | 1.96  | 1.78  |
| Stilbene-1 (SB1)                                   | $\delta C (126.18) / \delta H (6.7)$ |        | 0.67  | 0.59  | 0.67  | 0.87  | 1.49  |
| Acetovanillion (AV)                                | $\delta C (110.0) / \delta H (7.5)$  |        | 0.97  | 0.81  | 0.86  | 1.1   | 1.27  |
| Vanilline (V)                                      | $\delta C (111.9) / \delta H (7.4)$  |        | 1.43  | 1.11  | 1.33  | 0.85  | 1.51  |
| Vanillic acid (VA)                                 | $\delta C (124.0) / \delta H (7.4)$  |        | 0.38  | 0.35  | 0.52  | 0.64  | 0.98  |
| $\beta$ - $\beta$                                  | $\delta C (80.0) / \delta H (4.6)$   |        | 3.61  | 3.46  | 3.51  | 3.01  | 2.62  |
| $\beta$ -5                                         | $\delta C (86.7) / \delta H (5.5)$   |        | 1.66  | 1.6   | 1.57  | 1.14  | 0.78  |
| $\beta$ -O-4                                       | $\delta C (73.5) / \delta H (5.9)$   |        | 2.29  | 2.59  | 2.93  | 2.4   | 1.46  |

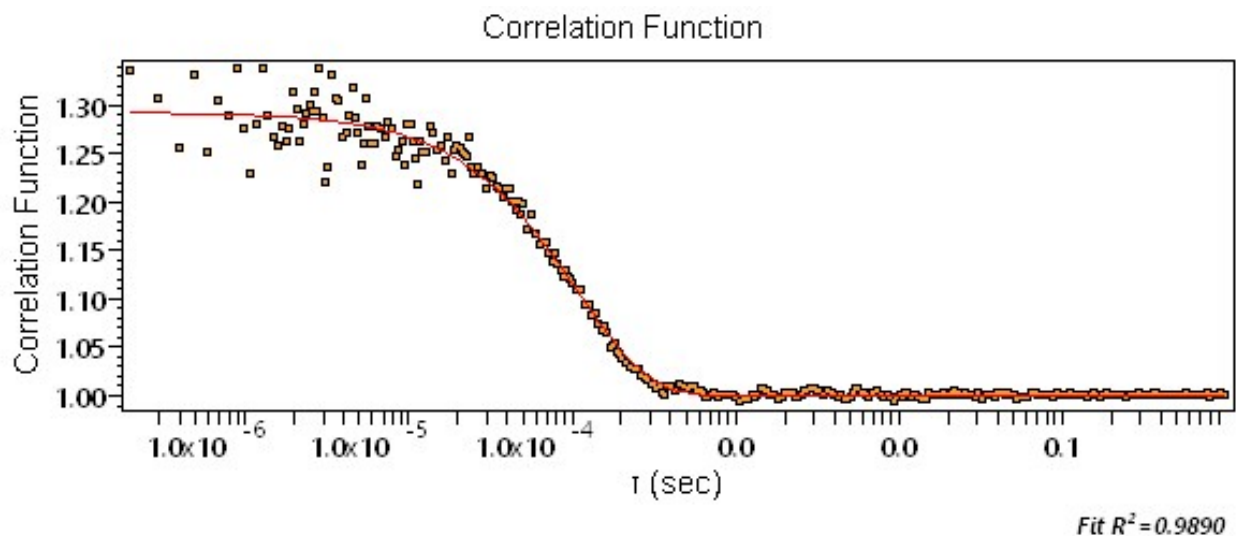

**Figure S6** Plot of correlation function (equation S1) for the calculation of diffusion coefficient ( $D_t$ ) based on quasi-elastic light scattering analysis (QELS) signal from the MALS detector (Angle 12);

$$g^{(2)}(\tau) = 1 + \beta e^{-2D_t q^2 \tau} \dots\dots (S1)$$

The hydrodynamic radius was calculated based on the Stokes-Einstein equation (S2)

$$D_t = \frac{kT}{6\pi\eta R_h} \quad (S2)$$

K: Boltzmann's constant; T: temperature (Kelvin);  $\eta$ : viscosity of solvent;  $R_h$ : hydrodynamic radius

**Table S6** Conformation and hydrodynamic radius information of different lignin fractions

|    | $D_t^a$ / (cm <sup>2</sup> /sec) | $R_g^b$ /nm | $R_h$ (Q) <sup>c</sup> /<br>nm | $R_g/R_h$ | $R_h(V)^d$ /<br>nm |
|----|----------------------------------|-------------|--------------------------------|-----------|--------------------|
| F1 | 1.53E-07                         | 19.73       | 8.43                           | 2.34      | 10.2               |
| F2 | -                                | -           | -                              | -         | 4.1                |
| F3 | -                                | -           | -                              | -         | 2.8                |
| F4 | -                                | -           | -                              | -         | 2.0                |
| F5 | -                                | -           | -                              | -         | 1.0                |

<sup>a</sup> diffusion coefficient (Dt); <sup>b</sup> gyration radius ( $R_g$ ) and <sup>c</sup> hydrodynamic radius  $R_h$  (Q) are based on the QELS signal from the MALS detector; <sup>d</sup>  $R_h(V)$ , hydrodynamic radius based on the viscometer detector.

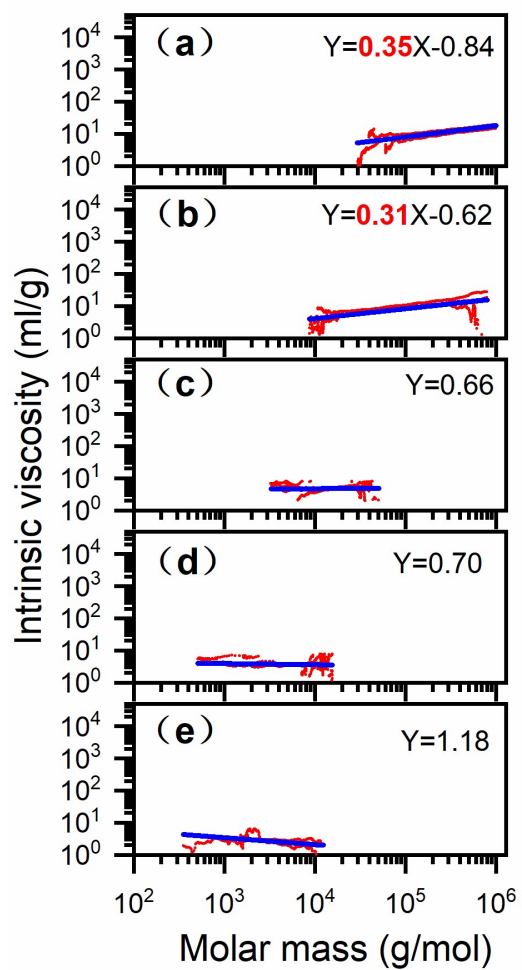

**Figure S7** Mark-Houwink–Sakurada plot of different esterified lignin fraction: (a) F1, (b) F2, (c) F3, (d) F4, and (e) F5; the intrinsic viscosity was calculated in related with the dRI signal

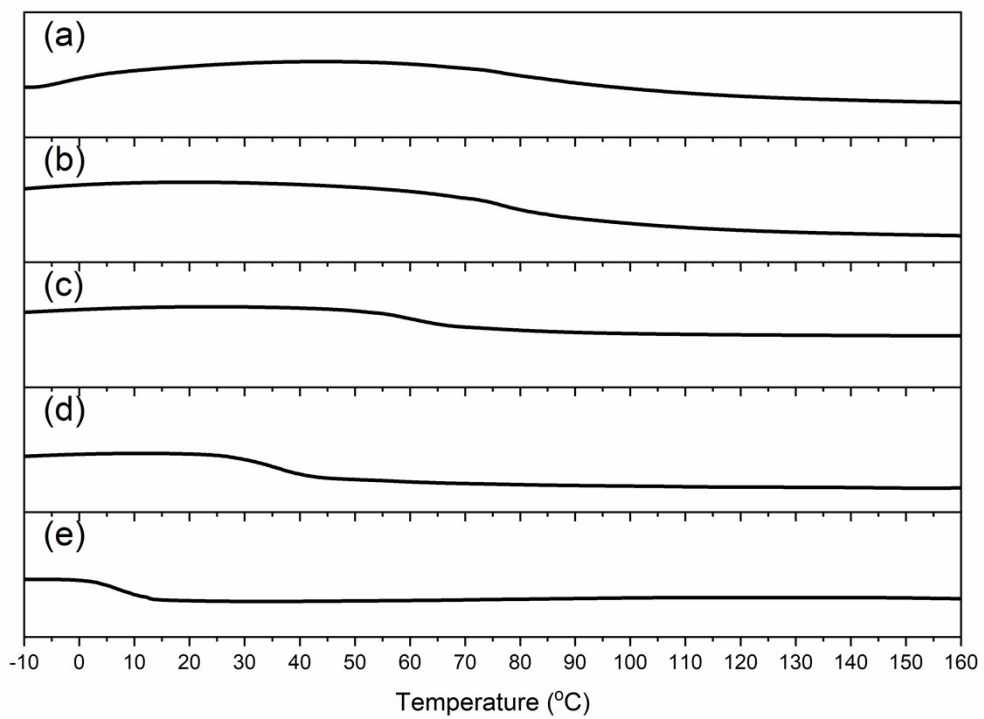

**Figure S8** DSC traces of different esterified lignin fractions: (a) F1, (b) F2, (c) F3, (d) F4, and (e) F5

**Table S7** Solubility test of different esterified lignin fractions

|                                 | $\delta_d\text{MPa}^{0.5}$ | $\delta_p\text{MPa}^{0.5}$ | $\delta_h\text{MPa}^{0.5}$ | SKL* | F1  | F2  | F3  | F4  | F5  | Solubility level                                                                         |
|---------------------------------|----------------------------|----------------------------|----------------------------|------|-----|-----|-----|-----|-----|------------------------------------------------------------------------------------------|
| Acetone                         | 16                         | 10                         | 7                          | ++   | +++ | +++ | +++ | +++ | +++ | 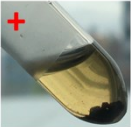 +    |
| Tetrahydrofuran<br>(THF)        | 17                         | 5.7                        | 8                          | ++   | +++ | +++ | +++ | +++ | +++ |  ++   |
| N-Methyl-2-pyrrolidone<br>(NMP) | 18                         | 12                         | 7.2                        | ++   | +++ | +++ | +++ | +++ | +++ |  +++  |
| Toluene                         | 18                         | 1.4                        | 2                          | +    | +   | +   | ++  | ++  | +++ |  +++  |
| Ethyl acetate                   | 16                         | 5.3                        | 7.2                        | +    | +++ | +++ | +++ | +++ | +++ |  +++ |

\* the solubility test was performed by mixing 5 mg lignin fraction with 0.5 ml different organic solvent in a 2 ml vial, following with vortex mixing thoroughly. After overnight stabilization, the solubility was evaluated based on above images.



## References

- 1 S. Podzimek, *Light Scattering, Size Exclusion Chromatography and Asymmetric Flow Field Flow Fractionation*, 2011.
- 2 L. Y. Liu, K. Bessler, S. Chen, M. Cho, Q. Hua and S. Rennekar, *Eur. Polym. J.*, 2021, **142**, 110082.
- 3 A. Tagami, C. Gioia, M. Lauberts, T. Budnyak, R. Moriana, M. E. Lindström and O. Sevastyanova, *Ind. Crops Prod.*, 2019, **129**, 123–134.
- 4 C. Gioia, G. Lo Re, M. Lawoko and L. Berglund, *J. Am. Chem. Soc.*, 2018, **140**, 4054–4061.
- 5 P. Olsén, M. Jawerth, M. Lawoko, M. Johansson and L. A. Berglund, *Green Chem.*, 2019, **21**, 2478–2486.
- 6 A. Duval, F. Vilaplana, C. Crestini and M. Lawoko, *Holzforschung*, 2016, **70**, 11–20.
- 7 K. A. Y. Koivu, H. Sadeghifar, P. A. Nousiainen, D. S. Argyropoulos and J. Sipilä, *ACS Sustain. Chem. Eng.*, 2016, **4**, 5238–5247.
- 8 E. L. Hult, K. Koivu, J. Asikkala, J. Ropponen, P. Wrigstedt, J. Sipilä and K. Poppius-Levlin, *Holzforschung*, 2013, **67**, 899–905.
- 9 L. Y. Liu, M. Cho, N. Sathitsuksanoh, S. Chowdhury and S. Rennekar, *ACS Sustain. Chem. Eng.*, 2018, **6**, 12251–12260.
- 10 M. Balakshin and E. Capanema, *J. Wood Chem. Technol.*, 2015, **35**, 220–237.
- 11 L.-Y. Liu, S. C. Patankar, R. P. Chandra, N. Sathitsuksanoh, J. N. Saddler and S. Rennekar, *ACS Sustain. Chem. Eng.*, 2020, **8**, 4745–4754.
